# Supplementary material for: Ramifications of POU4F3 variants associated with autosomal dominant hearing loss in various molecular aspects
Source: PubMed Central journal article supplement (PMC10400627; doi:10.1038/s41598-023-38272-w), 2023-08-03
Supplement: 41598_2023_38272_MOESM2_ESM.pdf [file 41598_2023_38272_MOESM2_ESM.pdf]

**Ramifications of *POU4F3* variants associated with autosomal dominant hearing loss in various molecular aspects**

Sang-Yeon Lee, Min Young Kim, Jin Hee Han, Sang Soo Park, Yejin Yun, Seung-Cheol Jee, Jae Joon Han, Jun Ho Lee, Heeyoung Seok\*, Byung Yoon Choi\*

**Table S1.** Profiles of eight RNA-sequencing libraries

|                          | <b>Total Reads</b> | <b>Reads<br/>(%, &gt;Q30)</b> | <b>Processed Reads</b> | <b>Mapped Reads</b> |
|--------------------------|--------------------|-------------------------------|------------------------|---------------------|
| BHR<br>(healthy control) | 123,269,416        | 95.57                         | 120,420,070            | 114,749,528         |
| CBY<br>(healthy control) | 125,464,050        | 95.53                         | 122,755,224            | 119,522,107         |
| JHW<br>(healthy control) | 112,964,020        | 94.98                         | 110,362,694            | 105,478,893         |
| LSY<br>(healthy control) | 123,936,098        | 95.91                         | 122,656,222            | 119,509,523         |
| SB218<br>(hearing loss)  | 131,504,578        | 95.59                         | 128,694,112            | 123,853,837         |
| SB307<br>(hearing loss)  | 131,529,466        | 95.92                         | 129,397,722            | 125,782,025         |
| SB438<br>(hearing loss)  | 107,493,944        | 95.7                          | 105,568,228            | 102,527,644         |
| SB347<br>(hearing loss)  | 114,897,400        | 95.62                         | 112,532,770            | 107,327,803         |

**Table S2.** A summary of the public data used in this study

| <b>SRR ID</b> | <b>Source Tissue</b>     | <b>Organism</b> | <b>Age</b>      | <b>Total Reads</b> | <b>Mapped Reads</b> | <b>Reference</b>                                                                |
|---------------|--------------------------|-----------------|-----------------|--------------------|---------------------|---------------------------------------------------------------------------------|
| SRR6798475    | Cochlear inner hair cell | mouse           | Adult           | 7,332,016          | 6,657,566           | Yi Li et al, Scientific Data volume 5, Article number: 180199 (2018)            |
| SRR6798476    | Cochlear inner hair cell | mouse           | Adult           | 229,368            | 2,085,153           |                                                                                 |
| SRR6798477    | Cochlear inner hair cell | mouse           | Adult           | 12,585,587         | 11,397,869          |                                                                                 |
| SRR6798479    | Cochlear outer hair cell | mouse           | Adult           | 14,468,752         | 12,296,204          |                                                                                 |
| SRR6798481    | Cochlear outer hair cell | mouse           | Adult           | 12,215,142         | 10,377,025          |                                                                                 |
| SRR6798482    | Cochlear outer hair cell | mouse           | Adult           | 7,161,499          | 6,087,056           |                                                                                 |
| SRR1534779    | Cochlea                  | mouse           | Postnatal day 0 | 117,562,038        | 23,321,842          | Scheffer D et al, The Journal of Neuroscience, April 22, 2015, 35(16):6366–6380 |
| SRR1534787    | Cochlea                  | mouse           | Postnatal day 4 | 29,941,458         | 20,392,791          |                                                                                 |
| SRR1534792    | Cochlea                  | mouse           | Postnatal day 7 | 36,343,531         | 23,813,133          |                                                                                 |
| SRR15597783   | Testis                   | mouse           | Adult           | 33,528,710         | 27,553,478          | Han G, Cho C Series GSE175633 (2021)                                            |
| SRR15597784   | Testis                   | mouse           | Adult           | 45,471,010         | 37,779,187          |                                                                                 |

**Table S3** in-silico prediction analysis for candidate variants in each family.

| Cohort    | Gene Name | Genomic Position: Change (GRCh37/hg19) | Transcript No.  | HGVS              |                   | Zygoty/Inheritance        | Insilico Predictions |       | Alternative Allele Frequency |                                         | Clinvar                |
|-----------|-----------|----------------------------------------|-----------------|-------------------|-------------------|---------------------------|----------------------|-------|------------------------------|-----------------------------------------|------------------------|
|           |           |                                        |                 | Nucleotide change | Amino Acid change |                           | CADD Phred           | REVEL | KRGDB (1722 individuals)     | GMAF (gnomAD)                           |                        |
| SB218-423 | DIAPH1    | 5-140953563 T-TGGA                     | NM_005219.4     | c.1851_1853dupTCC | p.Pro618dup       | Het / Autosomal dominant  | 6.028                | NA    | Absent                       | Absent                                  | Likely Benign          |
|           | GPR98     | 5-90106642 C-T                         | NM_032119.3     | c.15565C>T        | p.Pro5189Ser      | Het / Autosomal recessive | 17.21                | 0.086 | Absent                       | Exome(0.00004012)                       | No data                |
|           | HSD17B4   | 5-118814538 G-A                        | NM_001199.291.2 | c.519G>A          | p.Met173Ile       | Het / Autosomal recessive | 25.6                 | 0.777 | Absent                       | Exome(0.00003987)                       | No data                |
|           | POU4F3    | 5-145719552 G-GA                       | NM_002700.2     | c.564dupA         | p.Ala189fs        | Het / Autosomal dominant  | NA                   | NA    | Absent                       | Absent                                  | No data                |
|           | PTPN11    | 12-112926983 C-G                       | NM_002834.3     | c.1599+4C>G       |                   | Het / Autosomal dominant  | 6.33                 | NA    | Absent                       | Exome(0.00003979)                       | No data                |
|           | SLC26A4   | 7-107323901 C-T                        | NM_000441.1     | c.920C>T          | p.Thr307Met       | Het / Autosomal recessive | 28.4                 | 0.872 | Absent                       | Exome(0.00007569)<br>Genome(0.00009555) | Uncertain Significance |
|           | TUBB4B    | 9-140138040 A-AGT                      | NM_006088.5     | c.*36_*37dupTG    |                   | Het / Autosomal dominant  | 5.708                | NA    | Absent                       | Exome(0.0002952)<br>Genome(0.0002229)   | No data                |

  

| Cohort | Gene Name | Genomic Position: Change (GRCh37/hg19) | Transcript No. | HGVS              |                   | Zygoty/Inheritance | Insilico Predictions |       | Alternative Allele Frequency |               | Clinvar |
|--------|-----------|----------------------------------------|----------------|-------------------|-------------------|--------------------|----------------------|-------|------------------------------|---------------|---------|
|        |           |                                        |                | Nucleotide change | Amino Acid change |                    | CADD Phred           | REVEL | KRGDB (1722 individuals)     | GMAF (gnomAD) |         |

|           |        |                    |                    |           |             |                          |      |       |        |                                        |         |
|-----------|--------|--------------------|--------------------|-----------|-------------|--------------------------|------|-------|--------|----------------------------------------|---------|
| SB307-610 | DNMT1  | 19-10271082<br>G-A | NM_001130<br>823.1 | c.1021C>T | p.Arg341Cys | Het / Autosomal dominant | 23.2 | 0.068 | Absent | Exome(0.00003977)<br>Genome(0.0001273) | No data |
|           | POU4F3 | 5-145719733<br>T-C | NM_002700<br>.2    | c.743T>C  | p.Leu248Pro | Het / Autosomal dominant | 32.0 | 0.950 | Absent | Absent                                 | No data |

| Cohort    | Gene Name | Genomic Position: Change (GRCh37/hg19) | Transcript No.  | HGVS              |                   | Zygoty/Inheritance        | Insilico Predictions |       | Alternative Allele Frequency |                    | Clinvar                |
|-----------|-----------|----------------------------------------|-----------------|-------------------|-------------------|---------------------------|----------------------|-------|------------------------------|--------------------|------------------------|
|           |           |                                        |                 | Nucleotide change | Amino Acid change |                           | CADD Phred           | REVEL | KRGDB (1722 individuals)     | GMAF (gnomAD)      |                        |
| SB347-679 | ADCY1     | 7-45724654<br>C-T                      | NM_021116.<br>2 | c.2060C>T         | p.Ala687Val       | Het / Autosomal recessive | 23.0                 | 0.107 | Absent                       | Absent             | No data                |
|           | HARS2     | 5-140075180<br>A-AC                    | NM_012208<br>.3 | c.489dupC         | p.Ile164fs        | Het / Autosomal recessive | 23.4                 | NA    | Absent                       | Exome(0.00008748)  | Uncertain Singificance |
|           | POU4F3    | 5-145719942<br>G-A                     | NM_002700<br>.2 | c.952G>A          | p.Val318Met       | Het / Autosomal dominant  | 31.0                 | 0.936 | Absent                       | Absent             | Uncertain Significance |
|           | KLHL18    | 3-47376288<br>G-C                      | NM_025010<br>.4 | c.877G>C          | p.Val293Leu       | Het / Autosomal recessive | 26.8                 | 0.8   | Absent                       | Exome(0.000008009) | No data                |

| Cohort    | Gene Name | Genomic Position: Change (GRCh37/hg19) | Transcript No.  | HGVS                  |                   | Zygoty/Inheritance        | Insilico Predictions |       | Alternative Allele Frequency |                                 | Clinvar |
|-----------|-----------|----------------------------------------|-----------------|-----------------------|-------------------|---------------------------|----------------------|-------|------------------------------|---------------------------------|---------|
|           |           |                                        |                 | Nucleotide change     | Amino Acid change |                           | CADD Phred           | REVEL | KRGDB (1722 individuals)     | GMAF (gnomAD)                   |         |
| SB438-852 | CDH23     | 10-73157033<br>C-CCGAGG                | NM_022124<br>.5 | c.-35_-31dupAGGC<br>G |                   | Het / Autosomal recessive | 17.14                | NA    | Absent                       | Exome(0.3943)<br>Genome(0.3921) | No data |

|        |                        |                 |            |                  |                                 |      |       |        |                                                 |                           |
|--------|------------------------|-----------------|------------|------------------|---------------------------------|------|-------|--------|-------------------------------------------------|---------------------------|
| GPR98  | 5-<br>90072351<br>T-C  | NM_032119<br>.3 | c.12485T>C | p.Ile4162T<br>hr | Het /<br>Autosomal<br>recessive | 23.8 | 0.179 | Absent | Exome(0.0000<br>4820)<br>Genome(0.000<br>03185) | Uncertain<br>Singificance |
| POU4F3 | 5-<br>145719869<br>C-A | NM_002700<br>.2 | c.879C>A   | p.Phe293L<br>eu  | Het /<br>Autosomal<br>dominant  | 23.5 | 0.913 | Absent | Absent                                          | No data                   |
| SIX2   | 2-<br>45233332<br>T-G  | NM_016932<br>.4 | c.853A>C   | p.Asn285H<br>is  | Het /<br>Autosomal<br>dominant  | 24.9 | 0.458 | Absent | Absent                                          | No data                   |

---

**Table S4** Detailed information of molecular study

***Plasmid construction, cell culture, and transfection***

A human *POU4F3* cDNA clone (ORIGENE, CAT# RC211206) served as a template for *in vitro* mutagenesis. These *POU4F3* cDNA-loaded plasmids were subcloned into the pCMV expression vector using oligonucleotides that introduced MluI and AsiI restriction sites into the 5' and 3' of the cDNA. As described previously,<sup>1</sup> site-directed mutagenesis was performed to create plasmid construct encoding mutant *POU4F3*. Specifically, in the *POU4F3* p.Ala189Serfs\*26 plasmid, 376 bp of the cDNA sequence from the in-frame stop codon to the Myc-DDK codon was deleted, and ligation was subsequently performed. Human embryonic kidney 293T cell (HEK293T) line was obtained from American Type Culture Collection (ATCC; Manassas, VA, USA). HEK293T cells were transfected with constructs encoding wild-type and mutant proteins fused to C-terminal Myc-DDK tags using Lipofectamine 3000 transfection reagent (Invitrogen). After transfection for 48 hours, cells were fixed in 4% paraformaldehyde for 15 minutes, permeabilized in phosphate-buffered saline (PBS) containing 0.3% Triton X-100 for 10 minutes, and then blocked in PBS containing 10% donkey serum for 1 hour at 37°C in a humid atmosphere.

***Immunohistochemistry***

The transfected cells were fixed in 4% paraformaldehyde for 15 min, followed by PBS washing, and the process was repeated three times. The HEK293T cells were incubated at 24°C with primary antibodies (anti-Myc [mouse, cell signaling, #2276,1:4000] or anti-DDK [goat, cell signaling, #14793,1:800, 2 h]) (Sigma Aldrich Corp., St. Louis, MO, USA) for 2 h and Rhodamine phalloidin (Invitrogen, R415, 1:100) for 1 h. They were then washed three times with PBS (4°C), followed by consecutive incubation with secondary antibodies (anti-Myc; 488 goat anti-mouse, Invitrogen, A-11017, 1:400 for 2 h or anti-DDK; goat-anti-mouse Alexa680, Invitrogen, Seoul, Korea; 1:400 for 2 h) and Rhodamine phalloidin (Invitrogen, R415) 1:100 staining for 1h. After washing three times with PBS, the samples were mounted with DAPI (Vector Laboratories Inc., Burlingame, CA) at room temperature for 90 min. The samples were examined with a laser scanning confocal microscope (Zeiss LSM 510, Carl Zeiss, Germany). The number of cells expressing *POU4F3* either in the nucleus or the cytoplasm were measured using the Image J software.

***Western blot***

The cell line was cultured in DMEM (Gibco, Thermo Fisher Scientific, Waltham, MA, USA) at 37°C and humidified air of a 5% CO<sub>2</sub> incubator. The cells were transiently transfected with pCMV6-myc-DDK entry, pCMV6-*POU4F3* wild type-myc-DDK, pCMV-*POU4F3* A189S frameshift mutant-myc-DDK, pCMV-*POU4F3* L248P-myc-DDK, pCMV-*POU4F3* F293L-myc-DDK, and pCMV-*POU4F3* V318M-myc-DDK expressing plasmids using jetPRIME reagents (Polyplus-transfection SA, Illkirch-Graffenstaden, France), according to the manufacturer's instructions. Whole proteins were separated using 12.5% sodium dodecyl sulfate-polyacrylamide gel electrophoresis (SDS-PAGE) and transferred to 0.45 μm polyvinylidene difluoride (PVDF) membranes (Millipore; Billerica, MA, USA). The membranes were incubated with 5% skim milk to block nonspecific binding at room temperature for 1 h. Membrane blots were incubated against Myc-tag from Cell signaling Technology (Danvers, MA, USA) and β-actin from Santa Cruz biotechnology (Santacruz, CA, USA). The membranes with bound primary antibodies were incubated with anti-mouse secondary antibodies that were conjugated horseradish peroxidase (HRP) (Santacruz) for 1 h at room temperature. The protein band was detected using chemiluminescence (ATTA, Tokyo, Japan). X-ray films (Agfa, Mortsel, Belgium) were used for detection. β-actin antibodies were used as loading controls. The intensity of bands was measured using the Image J software.

***Reverse transcription-Polymerized Chain Reaction (RT-PCR)***

To verify *POU4F3* expression in LCLs, reverse transcription PCR was conducted following RNA extraction from these cells. The resulting amplicon size corresponded to the anticipated 246 bp, and subsequent Sanger sequencing with ClustalW alignment analysis revealed alignment with *POU4F3*. Furthermore, to validate *POU4F3* expression in HEK293 cells, reverse transcription PCR was performed post-RNA extraction to ascertain the expected size. The observed amplicon size was also 246 bp, and following Sanger sequencing, ClustalW alignment analysis confirmed alignment with *POU4F3*.

***Real-time quantitative reverse transcription-Polymerized Chain Reaction (RT-qPCR)***

For validation of the RNA sequencing, expression levels of selected genes were evaluated using RT-qPCR. Total RNA was extracted from the lymphoblastoid cell line using RNeasy Mini Kit (Qiagen Inc., Hilden, Germany). cDNA was synthesized using the PrimeScript Reverse Transcriptase-reagent Kit (TaKaRa, RR037A) according to the manufacturer's protocols. RT-qPCR was performed using a Light-Cycler 480 Instrument II, using the Light-Cycler 480 probes master kit (Roche; Indianapolis, IN, USA) and SYBR Premix Ex Taq II (TaKaRa, RR420A). The following primers were used for MYO6 genotyping: forward (5'-CCTGACCACTTAGCAGAGTTGG-3') and reverse (5'-TTTAATGCAGGCTTCAGCTCGATA -3'). The following primers were used for BMP2 genotyping: forward (5'- TGTATCGCAGGCACTCAGGTCA-3') and reverse (5'-CCATCCGTTTCTGGTACTTCTTC -3'). The following primers were used for AHI1 genotyping: forward (5'-GCTCAGTAGACACAGAACCTGG-3') and reverse (5'-CTCCTGCATTTAGTGAGAAGAGG-3'). The relative gene expression was calculated using the 2-ddCt analysis method with GAPDH as the endogenous control.

### **Luciferase assay**

HEK293T cells were transfected with the -711 bp upstream SNAP-25 promoter region (**Fig. S2**), including KpnI (GGTAC/C) and XhoI (C/TCGAG) sites, cloned into the pGL4.12[luc2CP] vector (Promega) with pCMV6 vector (Myc-DDK), pCMV6-wt POU4F3 cDNA, pCMV6-p.Ala189Serfs\*26 POU4F3 cDNA, pCMV6-p.Leu248Pro POU4F3 cDNA, pCMV6-p.Phe293Leu POU4F3 cDNA, and pCMV6-p.Val318Met POU4F3 cDNA. Forty-eight hours later, the cells were lysed with luciferase cell lysis buffer (200  $\mu$ L) and luciferase activities were measured under minimal ceiling effect conditions, according to the manufacturer's protocol (Promega, Madison, WI, USA). Experiments were performed in duplicate, and measurements were performed three times to identify Luciferase activity.

### **Table S5 RNA sequencing and bioinformatic analysis**

The RNA sequencing library was prepared and sequenced by Macrogen (Seoul, Korea). Further analyses were done by the Genomics Core Facility in Seoul National University Hospital (Seoul, Korea). RNA sequencing libraries were generated in accordance with the manufacturer's protocols (TruSeq Stranded TotalRNA LT sample prep kit; Illumina). After confirming library size, approximately 400–500 bp, paired-end sequencing was performed. Average total reads were 121,382,372 with over 95% of Q30 reads. For mapping and alignment, raw data were trimmed using the Trimmomatic program to remove adaptor sequences<sup>2</sup>. In addition, a window size of 4, mean quality of 15, and minimum length < 36 bp were set for trimming. Trimmed reads were mapped against the reference genome (GRCh37) using the HISAT2 program<sup>3</sup>. Over 95% of the processed reads were mapped and aligned using the Stringtie program to acquire transcript quantification<sup>4</sup>. In some cases, raw reads were analyzed using the Kallisto program as indicated.<sup>5</sup> Detailed information about the sequencing summary is presented in **Table S2**. Individual samples were further analyzed to achieve the DEG list using the DESeq2 program<sup>6</sup> with RLF normalization and nbinomWaldtest to list fold change over 2, and a p-value < 0.05. For the correlation analyses, normalized reads were used to calculate the Spearman's coefficient. DEGs were further analyzed using Hierarchical and K-mean clustering with Euclidean distance and average linkage, and visualized as a heatmap using either Morpheus or the Multiple Experiment Viewer software (MeV, v4.9.0)<sup>7</sup>. The Protein-Protein Interaction (PPI) analysis was performed using the Search Tool Retrieval of Interacting Genes/Proteins (STRING) v11.5 database<sup>8</sup>. Using the DEG list, g: profiler<sup>9</sup> or DAVID<sup>10</sup> ontology analyses were performed to examine the GO terms of biological process, cellular component, molecular function, and the KEGG pathway. Enriched GO terms were further analyzed using ReviGo<sup>11</sup> or QuickGo<sup>12</sup>.

## References

- 1 Lee, S. Y. *et al.* Novel genotype–phenotype correlation of functionally characterized LMX1A variants linked to sensorineural hearing loss. *Human Mutation* **41**, 1877-1883 (2020).
- 2 Bolger, A. M., Lohse, M. & Usadel, B. Trimmomatic: a flexible trimmer for Illumina sequence data. *Bioinformatics* **30**, 2114-2120 (2014).
- 3 Kim, D., Langmead, B. & Salzberg, S. L. HISAT: a fast spliced aligner with low memory requirements. *Nature methods* **12**, 357-360 (2015).
- 4 Pertea, M. *et al.* StringTie enables improved reconstruction of a transcriptome from RNA-seq reads. *Nature biotechnology* **33**, 290-295 (2015).
- 5 Bray, N. L., Pimentel, H., Melsted, P. & Pachter, L. Near-optimal probabilistic RNA-seq quantification. *Nature biotechnology* **34**, 525-527 (2016).
- 6 Love, M. I., Huber, W. & Anders, S. Moderated estimation of fold change and dispersion for RNA-seq data with DESeq2. *Genome biology* **15**, 1-21 (2014).
- 7 Saeed, A. *et al.* TM4: a free, open-source system for microarray data management and analysis. *Biotechniques* **34**, 374-378 (2003).
- 8 Szklarczyk, D. *et al.* STRING v11: protein–protein association networks with increased coverage, supporting functional discovery in genome-wide experimental datasets. *Nucleic acids research* **47**, D607-D613 (2019).
- 9 Reimand, J., Kull, M., Peterson, H., Hansen, J. & Vilo, J. g: Profiler—a web-based toolset for functional profiling of gene lists from large-scale experiments. *Nucleic acids research* **35**, W193-W200 (2007).
- 10 Huang, D. W., Sherman, B. T. & Lempicki, R. A. Systematic and integrative analysis of large gene lists using DAVID bioinformatics resources. *Nature protocols* **4**, 44-57 (2009).
- 11 Supek, F., Bošnjak, M., Škunca, N. & Šmuc, T. REVIGO summarizes and visualizes long lists of gene ontology terms. *PloS one* **6**, e21800 (2011).
- 12 Binns, D. *et al.* QuickGO: a web-based tool for Gene Ontology searching. *Bioinformatics* **25**, 3045-3046 (2009).
